# Supplementary material for: Screening of Endophytic Bacteria of Leucojum aestivum ‘Gravety Giant’ as a Potential Source of Alkaloids and as Antagonist to Some Plant Fungal Pathogens
Source: MDPI journal article supplement (doi:10.3390/microorganisms10102089), 2022-10-21
Supplement: s1 [file s1]

# Screening of endophytic bacteria of *Leucojum aestivum* 'Gravity giant' as a potential source of alkaloids and as antagonist to some plant fungal pathogens

Yuka Munakata<sup>1,2</sup>, Rosella Spina<sup>1,2</sup>, Sophie Slezack-Deschaumes<sup>1</sup>, Julie Genestier<sup>1</sup>, Alain Hehn<sup>1</sup>, Dominique Laurain-Mattar<sup>1,2,\*</sup>

<sup>1</sup> Université de Lorraine – INRAE, LAE, F-54000 Nancy, France;

<sup>2</sup> Université de Lorraine – CNRS, L2CM, F-54000 Nancy, France;

\* Correspondence: dominique.mattar@univ-lorraine.fr (D.L.M)

**Table S1.** Bacterial isolates of *Leucojum aestivum* ‘Gravety giant’ endophytes.

| Plant | Tissue | Strain     | Genbank Accession | Blast search result                              |           |         |                   |                     |                |
|-------|--------|------------|-------------------|--------------------------------------------------|-----------|---------|-------------------|---------------------|----------------|
|       |        |            |                   | Blast top hit                                    | E Value   | Tax Id  | Genus             | Order               | Phylum         |
| 1     | Bulb   | LaBFB1102  | OL307013          | Paenibacillus amylolyticus strain JCM 9906       | 0         | 1451    | Paenibacillus     | Bacillales          | Firmicutes     |
| 1     | Bulb   | LaBFB1103  | OL307014          | Streptomyces canescens strain DSM 40001          | 0         | 53445   | Streptomyces      | Streptomycetales    | Actinobacteria |
| 1     | Bulb   | LaBFB1301  | OL307015          | Patulibacter ginsengiterrae strain P4-5          | 0         | 556890  | Patulibacter      | Solirubrobacterales | Actinobacteria |
| 1     | Bulb   | LaBFB1302  | OL307016          | Patulibacter ginsengiterrae strain P4-5          | 0         | 556890  | Patulibacter      | Solirubrobacterales | Actinobacteria |
| 1     | Bulb   | LaBFB1601  | OL307017          | Mycobacterium hackensackense strain 147-0552     | 0         | 228909  | Mycobacterium     | Corynebacterales    | Actinobacteria |
| 1     | Root   | LaBFR1102a | OL305761          | Bacillus mycoides strain 273                     | 0         | 1405    | Bacillus          | Bacillales          | Firmicutes     |
| 1     | Root   | LaBFR1103  | OL305762          | Paraburkholderia fungorum strain LMG 16225       | 0         | 134537  | Paraburkholderia  | Burkholderiales     | Proteobacteria |
| 1     | Root   | LaBFR1104  | OL305763          | Paenibacillus populi strain LAM0705              | 0         | 1473572 | Paenibacillus     | Bacillales          | Firmicutes     |
| 1     | Root   | LaBFR1105  | OL305764          | [Brevibacterium] frigoritolerans strain DSM 8801 | 0         | 450367  | Bacillus          | Bacillales          | Firmicutes     |
| 1     | Root   | LaBFR1107  | OL305765          | Streptomyces canescens strain DSM 40001          | 0         | 53445   | Streptomyces      | Streptomycetales    | Actinobacteria |
| 1     | Root   | LaBFR1108c | OL305766          | Bacillus simplex NBRC 15720 = DSM 1321           | 0         | 1349754 | Peribacillus      | Bacillales          | Firmicutes     |
| 1     | Root   | LaBFR1109  | OL305767          | Paraburkholderia fungorum strain LMG 16225       | 0         | 134537  | Paraburkholderia  | Burkholderiales     | Proteobacteria |
| 1     | Root   | LaBFR1113a | OL305768          | Bacillus simplex NBRC 15720 = DSM 1321           | 0         | 1349754 | Peribacillus      | Bacillales          | Firmicutes     |
| 1     | Root   | LaBFR1113b | OL305769          | Bacillus idriensis strain SMC 4352-2             | 0         | 324768  | Bacillus          | Bacillales          | Firmicutes     |
| 1     | Root   | LaBFR1114  | OL305770          | Bacillus idriensis strain SMC 4352-2             | 0         | 324768  | Bacillus          | Bacillales          | Firmicutes     |
| 1     | Root   | LaBFR1201  | OL305771          | Bacillus idriensis strain SMC 4352-2             | 0         | 324768  | Bacillus          | Bacillales          | Firmicutes     |
| 1     | Root   | LaBFR1204a | -                 | Bacillus licheniformis strain DSM 13             | 9,00E-69  | 1402    | Bacillus          | Bacillales          | Firmicutes     |
| 1     | Root   | LaBFR1204b | OL305772          | Moraxella osloensis strain DSM 6998              | 0         | 34062   | Moraxella         | Pseudomonadales     | Proteobacteria |
| 1     | Root   | LaBFR1205a | OL305773          | Nocardioides cavernae strain YIM A1136           | 0         | 1921566 | Nocardioides      | Propionibacterales  | Actinobacteria |
| 1     | Root   | LaBFR1205b | -                 | Bacillus licheniformis strain DSM 13             | 3,00E-69  | 1402    | Bacillus          | Bacillales          | Firmicutes     |
| 1     | Root   | LaBFR1206  | OL305774          | Streptomyces bottropensis ATCC 25435             | 0         | 1054862 | Streptomyces      | Streptomycetales    | Actinobacteria |
| 1     | Root   | LaBFR1207  | OL305775          | Microbacterium natoriense strain TNJL143-2       | 0         | 284570  | Microbacterium    | Micrococcales       | Actinobacteria |
| 1     | Root   | LaBFR1301b | OL305776          | Rathayibacter festucae strain VKM Ac-1390        | 0         | 110937  | Rathayibacter     | Micrococcales       | Actinobacteria |
| 1     | Root   | LaBFR1303a | -                 | [Brevibacterium] frigoritolerans strain DSM 8801 | 0         | 450367  | Bacillus          | Bacillales          | Firmicutes     |
| 1     | Root   | LaBFR1303b | OL305777          | [Brevibacterium] frigoritolerans strain DSM 8801 | 0         | 450367  | Bacillus          | Bacillales          | Firmicutes     |
| 1     | Root   | LaBFR1304b | OL305778          | Paenibacillus endophyticus strain PECAE04        | 0         | 1294268 | Paenibacillus     | Bacillales          | Firmicutes     |
| 1     | Root   | LaBFR1305a | OL305779          | Staphylococcus warneri strain AW 25              | 0         | 1292    | Staphylococcus    | Bacillales          | Firmicutes     |
| 1     | Root   | LaBFR1305b | OL305780          | Paenibacillus endophyticus strain PECAE04        | 0         | 1294268 | Paenibacillus     | Bacillales          | Firmicutes     |
| 1     | Root   | LaBFR1307a | OL305781          | Caulobacter rhizosphaerae strain 7F14            | 0         | 2010972 | Caulobacter       | Caulobacterales     | Proteobacteria |
| 1     | Root   | LaBFR1308  | OL305782          | Labrys methylaminiphilus JLW10                   | 0         | 1096091 | Labrys            | Hyphomicrobiales    | Proteobacteria |
| 1     | Root   | LaBFR1309  | OL305783          | Paraburkholderia fungorum strain LMG 16225       | 0         | 134537  | Paraburkholderia  | Burkholderiales     | Proteobacteria |
| 1     | Root   | LaBFR1311  | OL305784          | Agrobacterium rhizogenes strain ATCC 11325       | 0         | 359     | Agrobacterium     | Hyphomicrobiales    | Proteobacteria |
| 1     | Shoot  | LaBFS1102  | OL307020          | Paraburkholderia fungorum strain LMG 16225       | 0         | 134537  | Paraburkholderia  | Burkholderiales     | Proteobacteria |
| 1     | Shoot  | LaBFS1106  | OL307021          | Patulibacter ginsengiterrae strain P4-5          | 0         | 556890  | Patulibacter      | Solirubrobacterales | Actinobacteria |
| 1     | Shoot  | LaBFS1107  | OL307022          | Chitinophaga ginsengisegetis strain Gsoil 040    | 0         | 393003  | Chitinophaga      | Chitinophagales     | Bacteroidetes  |
| 1     | Shoot  | LaBFS1112  | OL307023          | Variovorax ginsengisoli strain Gsoil 3165        | 0         | 363844  | Variovorax        | Burkholderiales     | Proteobacteria |
| 1     | Shoot  | LaBFS1201  | OL307024          | Staphylococcus warneri strain AW 25              | 0         | 1292    | Staphylococcus    | Bacillales          | Firmicutes     |
| 1     | Shoot  | LaBFS1206  | OL307025          | Achromobacter marplatensis strain B2             | 0         | 470868  | Achromobacter     | Burkholderiales     | Proteobacteria |
| 1     | Shoot  | LaBFS1208  | -                 | Mycolicibacterium setense strain CIP 109395      | 1,00E-151 | 431269  | Mycolicibacterium | Corynebacterales    | Actinobacteria |
| 1     | Shoot  | LaBFS1303  | OL307026          | Luteibacter jiangsuensis strain JW-64-1          | 0         | 637577  | Luteibacter       | Xanthomonadales     | Proteobacteria |
| 1     | Shoot  | LaBFS1306  | -                 | Dyella terrae strain JS14-6                      | 0         | 522259  | Dyella            | Xanthomonadales     | Proteobacteria |
| 1     | Shoot  | LaBFS1307  | OL307027          | Microbacterium luteolum strain IFO 15074         | 0         | 69367   | Microbacterium    | Micrococcales       | Actinobacteria |
| 1     | Shoot  | LaBFS1311  | OL307028          | Roseateles depolymerans strain 61A               | 9,00E-157 | 76731   | Roseateles        | Burkholderiales     | Proteobacteria |

|   |       |            |          |                                                      |           |         |                 |                     |                |
|---|-------|------------|----------|------------------------------------------------------|-----------|---------|-----------------|---------------------|----------------|
| 2 | Bulb  | LaBFB2301  | OL307018 | Agrobacterium rhizogenes strain ATCC 11325           | 0         | 359     | Agrobacterium   | Hyphomicrobiales    | Proteobacteria |
| 2 | Root  | LaBFR2101  | OL305785 | Microbacterium maritopicum strain DSM 12512          | 0         | 300020  | Microbacterium  | Micrococcales       | Actinobacteria |
| 2 | Root  | LaBFR2103  | OL305786 | Streptomyces phaeochromogenes strain NBRC 12898      | 0         | 1923    | Streptomyces    | Streptomycetales    | Actinobacteria |
| 2 | Root  | LaBFR2105a | OL305787 | Phyllobacterium ifriqiyense strain STM 370           | 0         | 314238  | Phyllobacterium | Hyphomicrobiales    | Proteobacteria |
| 2 | Root  | LaBFR2105b | OL305788 | [Brevibacterium] frigoritolerans strain DSM 8801     | 0         | 450367  | Bacillus        | Bacillales          | Firmicutes     |
| 2 | Root  | LaBFR2105c | OL305789 | Bacillus simplex NBRC 15720 = DSM 1321               | 0         | 1349754 | Peribacillus    | Bacillales          | Firmicutes     |
| 2 | Root  | LaBFR2107  | OL305790 | Paenibacillus harenae strain B519                    | 0         | 306543  | Paenibacillus   | Bacillales          | Firmicutes     |
| 2 | Root  | LaBFR2108  | OL305791 | Microlunatus nigridraconis strain CPCC 203993        | 0         | 1710544 | Microlunatus    | Propionibacteriales | Actinobacteria |
| 2 | Root  | LaBFR2201  | OL305792 | Leifsonia naganoensis strain DB103                   | 0         | 150025  | Leifsonia       | Micrococcales       | Actinobacteria |
| 2 | Root  | LaBFR2202  | OL305793 | Mycobacterium hackensackense strain 147-0552         | 0         | 228909  | Mycobacterium   | Corynebacteriales   | Actinobacteria |
| 2 | Root  | LaBFR2204a | OL305794 | Bacillus subtilis strain IAM 12118                   | 0         | 1423    | Bacillus        | Bacillales          | Firmicutes     |
| 2 | Root  | LaBFR2301  | OL305795 | Microbacterium natoriense strain TNJL143-2           | 0         | 284570  | Microbacterium  | Micrococcales       | Actinobacteria |
| 2 | Root  | LaBFR2303  | -        | Pedobacter ginsengisoli strain Gsoil 104             | 0         | 363852  | Pedobacter      | Sphingobacteriales  | Bacteroidetes  |
| 2 | Shoot | LaBFS2101  | OL307029 | Rahnella aquatilis CIP 78.65 = ATCC 33071 strain DSM | 0         | 745277  | Rahnella        | Enterobacterales    | Proteobacteria |
| 2 | Shoot | LaBFS2102  | OL307030 | Rahnella aquatilis CIP 78.65 = ATCC 33071 strain DSM | 0         | 745277  | Rahnella        | Enterobacterales    | Proteobacteria |
| 2 | Shoot | LaBFS2103  | OL307031 | Comamonas denitrificans strain 123                   | 0         | 117506  | Comamonas       | Burkholderiales     | Proteobacteria |
| 2 | Shoot | LaBFS2104  | OL307032 | Rahnella aquatilis CIP 78.65 = ATCC 33071 strain DSM | 0         | 745277  | Rahnella        | Enterobacterales    | Proteobacteria |
| 2 | Shoot | LaBFS2105  | OL307033 | Rahnella aquatilis CIP 78.65 = ATCC 33071 strain DSM | 0         | 745277  | Rahnella        | Enterobacterales    | Proteobacteria |
| 2 | Shoot | LaBFS2109  | OL307034 | Rahnella aquatilis CIP 78.65 = ATCC 33071 strain DSM | 0         | 745277  | Rahnella        | Enterobacterales    | Proteobacteria |
| 2 | Shoot | LaBFS2110  | OL307035 | Rahnella aquatilis CIP 78.65 = ATCC 33071 strain DSM | 0         | 745277  | Rahnella        | Enterobacterales    | Proteobacteria |
| 2 | Shoot | LaBFS2111  | OL307036 | Rahnella aquatilis CIP 78.65 = ATCC 33071 strain DSM | 0         | 745277  | Rahnella        | Enterobacterales    | Proteobacteria |
| 2 | Shoot | LaBFS2112  | OL307037 | Rahnella aquatilis CIP 78.65 = ATCC 33071 strain DSM | 0         | 745277  | Rahnella        | Enterobacterales    | Proteobacteria |
| 2 | Shoot | LaBFS2113  | OL307038 | Rahnella aquatilis CIP 78.65 = ATCC 33071 strain DSM | 0         | 745277  | Rahnella        | Enterobacterales    | Proteobacteria |
| 2 | Shoot | LaBFS2201  | -        | Microbacterium arthrosphaerae strain CC-VM-Y         | 7,00E-55  | 792652  | Microbacterium  | Micrococcales       | Actinobacteria |
| 2 | Shoot | LaBFS2202  | OL307039 | Rahnella aquatilis CIP 78.65 = ATCC 33071 strain DSM | 0         | 745277  | Rahnella        | Enterobacterales    | Proteobacteria |
| 2 | Shoot | LaBFS2203  | OL307040 | Rahnella aquatilis CIP 78.65 = ATCC 33071 strain DSM | 0         | 745277  | Rahnella        | Enterobacterales    | Proteobacteria |
| 2 | Shoot | LaBFS2204  | OL307041 | Rahnella aquatilis CIP 78.65 = ATCC 33071 strain DSM | 0         | 745277  | Rahnella        | Enterobacterales    | Proteobacteria |
| 2 | Shoot | LaBFS2205  | OL307042 | Erwinia persicina strain NBRC 102418                 | 0         | 55211   | Erwinia         | Enterobacterales    | Proteobacteria |
| 2 | Shoot | LaBFS2208  | OL307043 | Rahnella aquatilis CIP 78.65 = ATCC 33071 strain DSM | 0         | 745277  | Rahnella        | Enterobacterales    | Proteobacteria |
| 2 | Shoot | LaBFS2301  | OL307044 | Rahnella aquatilis CIP 78.65 = ATCC 33071 strain DSM | 0         | 745277  | Rahnella        | Enterobacterales    | Proteobacteria |
| 2 | Shoot | LaBFS2302  | OL307045 | Rahnella aquatilis CIP 78.65 = ATCC 33071 strain DSM | 0         | 745277  | Rahnella        | Enterobacterales    | Proteobacteria |
| 2 | Shoot | LaBFS2303  | OL307046 | Rahnella aquatilis CIP 78.65 = ATCC 33071 strain DSM | 0         | 745277  | Rahnella        | Enterobacterales    | Proteobacteria |
| 2 | Shoot | LaBFS2304  | OL307047 | Rahnella aquatilis CIP 78.65 = ATCC 33071 strain DSM | 0         | 745277  | Rahnella        | Enterobacterales    | Proteobacteria |
| 2 | Shoot | LaBFS2305  | OL307048 | Rahnella aquatilis CIP 78.65 = ATCC 33071 strain DSM | 0         | 745277  | Rahnella        | Enterobacterales    | Proteobacteria |
| 2 | Shoot | LaBFS2306  | OL307049 | Rahnella aquatilis CIP 78.65 = ATCC 33071 strain DSM | 0         | 745277  | Rahnella        | Enterobacterales    | Proteobacteria |
| 2 | Shoot | LaBFS2308  | OL307050 | Rahnella aquatilis CIP 78.65 = ATCC 33071 strain DSM | 0         | 745277  | Rahnella        | Enterobacterales    | Proteobacteria |
| 2 | Shoot | LaBFS2309  | OL307051 | Rahnella aquatilis CIP 78.65 = ATCC 33071 strain DSM | 8,00E-127 | 745277  | Rahnella        | Enterobacterales    | Proteobacteria |
| 2 | Shoot | LaBFS2310  | OL307052 | Rahnella aquatilis CIP 78.65 = ATCC 33071 strain DSM | 0         | 745277  | Rahnella        | Enterobacterales    | Proteobacteria |
| 2 | Shoot | LaBFS2313  | OL307053 | Rahnella aquatilis CIP 78.65 = ATCC 33071 strain DSM | 0         | 745277  | Rahnella        | Enterobacterales    | Proteobacteria |
| 2 | Shoot | LaBFS2314  | OL307054 | Rahnella aquatilis CIP 78.65 = ATCC 33071 strain DSM | 0         | 745277  | Rahnella        | Enterobacterales    | Proteobacteria |
| 2 | Shoot | LaBFS2315  | OL307055 | Rahnella aquatilis CIP 78.65 = ATCC 33071 strain DSM | 0         | 745277  | Rahnella        | Enterobacterales    | Proteobacteria |
| 2 | Shoot | LaBFS2316  | OL307056 | Rahnella aquatilis CIP 78.65 = ATCC 33071 strain DSM | 0         | 745277  | Rahnella        | Enterobacterales    | Proteobacteria |
| 2 | Shoot | LaBFS2317  | OL307057 | Achromobacter marplatensis strain R-46660            | 0         | 470868  | Achromobacter   | Burkholderiales     | Proteobacteria |
| 2 | Shoot | LaBFS2318  | OL307058 | Rahnella aquatilis CIP 78.65 = ATCC 33071 strain DSM | 0         | 745277  | Rahnella        | Enterobacterales    | Proteobacteria |

|         |            |          |                                                  |           |         |                   |                   |                |
|---------|------------|----------|--------------------------------------------------|-----------|---------|-------------------|-------------------|----------------|
| 3 Bulb  | LaBFB3301  | OL307019 | Luteibacter rhizovicius strain LJ96              | 0         | 242606  | Luteibacter       | Xanthomonadales   | Proteobacteria |
| 3 Root  | LaBFR3101a | OL305796 | Paenibacillus lautus strain AB236d               | 0         | 1401    | Paenibacillus     | Bacillales        | Firmicutes     |
| 3 Root  | LaBFR3101b | OL305797 | Paenarthrobacter nitroguajacolicus strain G2-1   | 0         | 211146  | Paenarthrobacter  | Micrococcales     | Actinobacteria |
| 3 Root  | LaBFR3102b | OL305798 | Paenibacillus lautus strain AB236d               | 0         | 1401    | Paenibacillus     | Bacillales        | Firmicutes     |
| 3 Root  | LaBFR3103  | OL305799 | Streptomyces canescens strain DSM 40001          | 0         | 53445   | Streptomyces      | Streptomycetales  | Actinobacteria |
| 3 Root  | LaBFR3104  | OL305800 | Paenibacillus lautus strain AB236d               | 0         | 1401    | Paenibacillus     | Bacillales        | Firmicutes     |
| 3 Root  | LaBFR3105b | OL305801 | Paenibacillus lautus strain AB236d               | 0         | 1401    | Paenibacillus     | Bacillales        | Firmicutes     |
| 3 Root  | LaBFR3106  | OL305802 | Microbacterium maritipicum strain DSM 12512      | 0         | 300020  | Microbacterium    | Micrococcales     | Actinobacteria |
| 3 Root  | LaBFR3107a | OL305803 | Promicromonospora alba strain 1C-HV12            | 0         | 1616110 | Promicromonospora | Micrococcales     | Actinobacteria |
| 3 Root  | LaBFR3107b | OL305804 | Promicromonospora alba strain 1C-HV12            | 0         | 1616110 | Promicromonospora | Micrococcales     | Actinobacteria |
| 3 Root  | LaBFR3108  | OL305805 | Paenibacillus lautus strain AB236d               | 0         | 1401    | Paenibacillus     | Bacillales        | Firmicutes     |
| 3 Root  | LaBFR3109  | OL305806 | Paenibacillus lautus strain AB236d               | 0         | 1401    | Paenibacillus     | Bacillales        | Firmicutes     |
| 3 Root  | LaBFR3110  | OL305807 | Paenibacillus lautus strain AB236d               | 0         | 1401    | Paenibacillus     | Bacillales        | Firmicutes     |
| 3 Root  | LaBFR3202  | OL305808 | Bacillus marisflavi strain TF-11                 | 0         | 189381  | Rosellomorea      | Bacillales        | Firmicutes     |
| 3 Root  | LaBFR3203  | OL305809 | Agrobacterium tumefaciens strain IAM 12048       | 0         | 358     | Agrobacterium     | Hyphomicrobiales  | Proteobacteria |
| 3 Root  | LaBFR3207  | OL305810 | Inquilinus limosus strain AU476                  | 0         | 171674  | Inquilinus        | Rhodospirillales  | Proteobacteria |
| 3 Root  | LaBFR3209  | OL305811 | Caulobacter segnis strain MBIC 2835              | 0         | 88688   | Caulobacter       | Caulobacterales   | Proteobacteria |
| 3 Root  | LaBFR3210  | OL305812 | Phyllobacterium trifolii strain PETP02           | 0         | 300193  | Phyllobacterium   | Hyphomicrobiales  | Proteobacteria |
| 3 Root  | LaBFR3211  | OL305813 | Nocardia rhamnosiphila NBRC 108938 strain 202GMO | 0         | 1223547 | Nocardia          | Corynebacteriales | Actinobacteria |
| 3 Root  | LaBFR3212  | OL305814 | Staphylococcus epidermidis strain Fussel         | 0         | 1282    | Staphylococcus    | Bacillales        | Firmicutes     |
| 3 Root  | LaBFR3301b | OL305815 | Sphingopyxis chilensis strain S37                | 0         | 180400  | Sphingopyxis      | Sphingomonadales  | Proteobacteria |
| 3 Root  | LaBFR3303  | OL305816 | Sphingopyxis chilensis strain S37                | 0         | 180400  | Sphingopyxis      | Sphingomonadales  | Proteobacteria |
| 3 Root  | LaBFR3305a | OL305817 | Ensifer adhaerens strain LMG 20216               | 0         | 106592  | Ensifer           | Hyphomicrobiales  | Proteobacteria |
| 3 Root  | LaBFR3305b | -        | Streptomyces canescens strain DSM 40001          | 2,00E-147 | 53445   | Streptomyces      | Streptomycetales  | Actinobacteria |
| 3 Root  | LaBFR3307  | OL305818 | Bacillus cereus strain IAM 12605                 | 0         | 1396    | Bacillus          | Bacillales        | Firmicutes     |
| 3 Root  | LaBFR3308a | OL305819 | Streptomyces canescens strain DSM 40001          | 0         | 53445   | Streptomyces      | Streptomycetales  | Actinobacteria |
| 3 Root  | LaBFR3308b | OL305820 | Streptomyces canescens strain DSM 40001          | 0         | 53445   | Streptomyces      | Streptomycetales  | Actinobacteria |
| 3 Root  | LaBFR3311  | OL305821 | Nocardia jinanensis strain 04-5195               | 0         | 382504  | Nocardia          | Corynebacteriales | Actinobacteria |
| 3 Root  | LaBFR3312  | OL305822 | Ensifer adhaerens strain LMG 20216               | 0         | 106592  | Ensifer           | Hyphomicrobiales  | Proteobacteria |
| 3 Shoot | LaBFS3102  | OL307059 | Variovorax guangxiensis strain GXGD002           | 0         | 1775474 | Variovorax        | Burkholderiales   | Proteobacteria |
| 3 Shoot | LaBFS3103  | OL307060 | Luteibacter jiangsuensis strain JW-64-1          | 0         | 637577  | Luteibacter       | Xanthomonadales   | Proteobacteria |
| 3 Shoot | LaBFS3104  | OL307061 | Variovorax paradoxus NBRC 15149                  | 0         | 1321610 | Variovorax        | Burkholderiales   | Proteobacteria |
| 3 Shoot | LaBFS3105  | OL307062 | Variovorax paradoxus NBRC 15149                  | 0         | 1321610 | Variovorax        | Burkholderiales   | Proteobacteria |
| 3 Shoot | LaBFS3108  | OL307063 | Herbiconiux ginsengi strain wged11               | 0         | 381665  | Herbiconiux       | Micrococcales     | Actinobacteria |
| 3 Shoot | LaBFS3109  | OL307064 | Paraburkholderia fungorum strain LMG 16225       | 0         | 134537  | Paraburkholderia  | Burkholderiales   | Proteobacteria |
| 3 Shoot | LaBFS3201  | OL307065 | Variovorax boronicumulans NBRC 103145            | 0         | 1321609 | Variovorax        | Burkholderiales   | Proteobacteria |
| 3 Shoot | LaBFS3203  | OL307066 | Variovorax boronicumulans NBRC 103145            | 0         | 1321609 | Variovorax        | Burkholderiales   | Proteobacteria |
| 3 Shoot | LaBFS3205  | OL307067 | Pseudomonas brassicacearum strain DBK11          | 0         | 930166  | Pseudomonas       | Pseudomonadales   | Proteobacteria |
| 3 Shoot | LaBFS3206  | OL307068 | Variovorax boronicumulans NBRC 103145            | 0         | 1321609 | Variovorax        | Burkholderiales   | Proteobacteria |
| 3 Shoot | LaBFS3208  | OL307069 | Novosphingobium lindaniclasticum LE124           | 0         | 1096930 | Novosphingobium   | Sphingomonadales  | Proteobacteria |
| 3 Shoot | LaBFS3209  | OL307070 | Variovorax boronicumulans NBRC 103145            | 0         | 1321609 | Variovorax        | Burkholderiales   | Proteobacteria |
| 3 Shoot | LaBFS3301  | OL307071 | Herbaspirillum hiltneri N3                       | 0         | 1262470 | Herbaspirillum    | Burkholderiales   | Proteobacteria |
| 3 Shoot | LaBFS3302  | OL307072 | Herbaspirillum hiltneri N3                       | 0         | 1262470 | Herbaspirillum    | Burkholderiales   | Proteobacteria |
| 3 Shoot | LaBFS3303  | OL307073 | Leifsonia naganensis strain DB103                | 0         | 150025  | Leifsonia         | Micrococcales     | Actinobacteria |
| 3 Shoot | LaBFS3304  | OL307074 | Chitinophaga ginsengisegetis strain Gsoil 040    | 0         | 393003  | Chitinophaga      | Chitinophagales   | Bacteroidetes  |
| 3 Shoot | LaBFS3305  | OL307075 | Variovorax ginsengisoli strain Gsoil 3165        | 0         | 363844  | Variovorax        | Burkholderiales   | Proteobacteria |
| 3 Shoot | LaBFS3306  | OL307080 | Luteibacter jiangsuensis strain JW-64-1          | 0         | 637577  | Luteibacter       | Xanthomonadales   | Proteobacteria |
| 3 Shoot | LaBFS3307  | OL307076 | Luteibacter jiangsuensis strain JW-64-1          | 0         | 637577  | Luteibacter       | Xanthomonadales   | Proteobacteria |
| 3 Shoot | LaBFS3309  | OL307077 | Curtobacterium citreum strain DSM 20528          | 0         | 2036    | Curtobacterium    | Micrococcales     | Actinobacteria |
| 3 Shoot | LaBFS3313  | OL307078 | Arthrobacter oryzae strain KV-651                | 0         | 409290  | Arthrobacter      | Micrococcales     | Actinobacteria |
| 3 Shoot | LaBFS3315  | OL307079 | Luteibacter jiangsuensis strain JW-64-1          | 0         | 637577  | Luteibacter       | Xanthomonadales   | Proteobacteria |

**Table S2.** Bacterial genera found as endophytes in the studies using Amaryllidaceae plants

| Bacterial genus        | bulb                                                   |                                                                        |                                                                  |                                                 |                                                            |                                                         | in vitro<br>bulblet                                    |                                                                  |                                                 | leaf                                                   |                                                 |  | root |  |
|------------------------|--------------------------------------------------------|------------------------------------------------------------------------|------------------------------------------------------------------|-------------------------------------------------|------------------------------------------------------------|---------------------------------------------------------|--------------------------------------------------------|------------------------------------------------------------------|-------------------------------------------------|--------------------------------------------------------|-------------------------------------------------|--|------|--|
|                        | <i>Lycoris<br/>radiata</i><br>(Liu et<br>al.,<br>2020) | <i>Crinum<br/>macowanii</i><br>Baker<br>(Rebotiloe<br>et al.,<br>2018) | <i>Crinum<br/>macowanii</i><br>Baker<br>(Sebola et<br>al., 2019) | <i>Leucojum<br/>aestivum</i><br>(this<br>study) | <i>Narcissus<br/>tazetta</i><br>(Wang et<br>al.,<br>2015b) | <i>Leucojum<br/>aestivum</i><br>(Spina et<br>al., 2021) | <i>Lycoris<br/>radiata</i><br>(Liu et<br>al.,<br>2020) | <i>Crinum<br/>macowanii</i><br>Baker<br>(Sebola et<br>al., 2020) | <i>Leucojum<br/>aestivum</i><br>(this<br>study) | <i>Lycoris<br/>radiata</i><br>(Liu et<br>al.,<br>2020) | <i>Leucojum<br/>aestivum</i><br>(this<br>study) |  |      |  |
| <i>Achromobacter</i>   | 0                                                      | 0                                                                      | 0                                                                | 0                                               | 1                                                          | 0                                                       | 0                                                      | 0                                                                | 1                                               | 0                                                      | 0                                               |  |      |  |
| <i>Acinetobacter</i>   | 0                                                      | 1                                                                      | 1                                                                | 0                                               | 0                                                          | 0                                                       | 1                                                      | 1                                                                | 0                                               | 1                                                      | 0                                               |  |      |  |
| <i>Agrobacterium</i>   | 0                                                      | 0                                                                      | 0                                                                | 1                                               | 0                                                          | 0                                                       | 0                                                      | 0                                                                | 0                                               | 0                                                      | 1                                               |  |      |  |
| <i>Arthrobacter</i>    | 0                                                      | 0                                                                      | 0                                                                | 0                                               | 0                                                          | 0                                                       | 0                                                      | 1                                                                | 1                                               | 0                                                      | 0                                               |  |      |  |
| <i>Azoarcus</i>        | 1                                                      | 0                                                                      | 0                                                                | 0                                               | 0                                                          | 0                                                       | 0                                                      | 0                                                                | 0                                               | 0                                                      | 0                                               |  |      |  |
| <i>Bacillus</i>        | 1                                                      | 1                                                                      | 1                                                                | 0                                               | 0                                                          | 1                                                       | 1                                                      | 1                                                                | 0                                               | 1                                                      | 1                                               |  |      |  |
| <i>Brachybacterium</i> | 0                                                      | 0                                                                      | 0                                                                | 0                                               | 0                                                          | 0                                                       | 0                                                      | 0                                                                | 0                                               | 0                                                      | 0                                               |  |      |  |
| <i>Brevibacterium</i>  | 0                                                      | 0                                                                      | 0                                                                | 0                                               | 0                                                          | 0                                                       | 1                                                      | 0                                                                | 0                                               | 0                                                      | 1                                               |  |      |  |
| <i>Brevundimonas</i>   | 0                                                      | 0                                                                      | 0                                                                | 0                                               | 0                                                          | 0                                                       | 0                                                      | 0                                                                | 0                                               | 1                                                      | 0                                               |  |      |  |
| <i>Burkholderia</i>    | 1                                                      | 0                                                                      | 1                                                                | 0                                               | 0                                                          | 0                                                       | 0                                                      | 0                                                                | 0                                               | 1                                                      | 0                                               |  |      |  |
| <i>Caulobacter</i>     | 0                                                      | 0                                                                      | 0                                                                | 0                                               | 0                                                          | 0                                                       | 0                                                      | 0                                                                | 0                                               | 0                                                      | 1                                               |  |      |  |
| <i>Chitinophaga</i>    | 0                                                      | 0                                                                      | 0                                                                | 0                                               | 0                                                          | 0                                                       | 0                                                      | 0                                                                | 1                                               | 0                                                      | 0                                               |  |      |  |
| <i>Cohnella</i>        | 0                                                      | 0                                                                      | 0                                                                | 0                                               | 0                                                          | 0                                                       | 0                                                      | 0                                                                | 0                                               | 1                                                      | 0                                               |  |      |  |
| <i>Comamonas</i>       | 0                                                      | 0                                                                      | 0                                                                | 0                                               | 0                                                          | 0                                                       | 0                                                      | 0                                                                | 1                                               | 0                                                      | 0                                               |  |      |  |
| <i>Curtobacterium</i>  | 0                                                      | 0                                                                      | 0                                                                | 0                                               | 0                                                          | 0                                                       | 0                                                      | 0                                                                | 1                                               | 0                                                      | 0                                               |  |      |  |
| <i>Dyella</i>          | 0                                                      | 0                                                                      | 0                                                                | 0                                               | 0                                                          | 0                                                       | 0                                                      | 0                                                                | 1                                               | 0                                                      | 0                                               |  |      |  |
| <i>Ensifer</i>         | 0                                                      | 0                                                                      | 0                                                                | 0                                               | 0                                                          | 0                                                       | 0                                                      | 0                                                                | 0                                               | 0                                                      | 1                                               |  |      |  |
| <i>Enterobacter</i>    | 1                                                      | 0                                                                      | 0                                                                | 0                                               | 0                                                          | 0                                                       | 0                                                      | 1                                                                | 0                                               | 1                                                      | 0                                               |  |      |  |
| <i>Erwinia</i>         | 0                                                      | 0                                                                      | 0                                                                | 0                                               | 0                                                          | 0                                                       | 0                                                      | 0                                                                | 1                                               | 0                                                      | 0                                               |  |      |  |
| <i>Fictibacillus</i>   | 0                                                      | 0                                                                      | 0                                                                | 0                                               | 0                                                          | 0                                                       | 0                                                      | 0                                                                | 0                                               | 1                                                      | 0                                               |  |      |  |
| <i>Herbaspirillum</i>  | 0                                                      | 0                                                                      | 0                                                                | 0                                               | 0                                                          | 0                                                       | 0                                                      | 0                                                                | 1                                               | 1                                                      | 0                                               |  |      |  |
| <i>Herbiconiux</i>     | 0                                                      | 0                                                                      | 0                                                                | 0                                               | 0                                                          | 0                                                       | 0                                                      | 0                                                                | 1                                               | 0                                                      | 0                                               |  |      |  |
| <i>Inquilinus</i>      | 0                                                      | 0                                                                      | 0                                                                | 0                                               | 0                                                          | 0                                                       | 0                                                      | 0                                                                | 0                                               | 0                                                      | 1                                               |  |      |  |
| <i>Labrys</i>          | 0                                                      | 0                                                                      | 0                                                                | 0                                               | 0                                                          | 0                                                       | 0                                                      | 0                                                                | 0                                               | 0                                                      | 1                                               |  |      |  |
| <i>Leifsonia</i>       | 0                                                      | 0                                                                      | 0                                                                | 0                                               | 0                                                          | 0                                                       | 0                                                      | 0                                                                | 1                                               | 0                                                      | 1                                               |  |      |  |
| <i>Luteibacter</i>     | 0                                                      | 0                                                                      | 0                                                                | 1                                               | 0                                                          | 0                                                       | 1                                                      | 0                                                                | 1                                               | 0                                                      | 0                                               |  |      |  |

|                          |   |   |   |   |   |   |    |   |    |    |    |   |
|--------------------------|---|---|---|---|---|---|----|---|----|----|----|---|
| <i>Lysobacter</i>        | 0 | 0 | 0 | 0 | 0 | 0 | 0  | 0 | 0  | 0  | 1  | 0 |
| <i>Methylobacterium</i>  | 0 | 0 | 0 | 0 | 0 | 0 | 1  | 0 | 0  | 0  | 0  | 0 |
| <i>Microbacterium</i>    | 1 | 0 | 0 | 0 | 0 | 0 | 0  | 0 | 1  | 0  | 1  | 0 |
| <i>Microthax</i>         | 0 | 0 | 0 | 0 | 0 | 0 | 0  | 0 | 0  | 0  | 1  | 0 |
| <i>Moraxella</i>         | 0 | 0 | 0 | 0 | 0 | 0 | 0  | 0 | 0  | 0  | 1  | 0 |
| <i>Mycobacterium</i>     | 0 | 0 | 0 | 1 | 0 | 0 | 0  | 0 | 0  | 0  | 1  | 0 |
| <i>Mycolicibacterium</i> | 0 | 0 | 0 | 0 | 0 | 0 | 0  | 0 | 1  | 0  | 0  | 0 |
| <i>Nocardia</i>          | 0 | 0 | 0 | 0 | 0 | 0 | 0  | 0 | 0  | 0  | 1  | 0 |
| <i>Nocardioides</i>      | 0 | 0 | 0 | 0 | 0 | 0 | 1  | 0 | 0  | 0  | 1  | 0 |
| <i>Novosphingobium</i>   | 0 | 0 | 1 | 0 | 0 | 0 | 0  | 0 | 1  | 1  | 0  | 0 |
| <i>Paenarthrobacter</i>  | 0 | 0 | 0 | 0 | 0 | 0 | 0  | 0 | 0  | 0  | 1  | 0 |
| <i>Paenibacillus</i>     | 0 | 0 | 0 | 1 | 0 | 0 | 0  | 0 | 0  | 1  | 1  | 0 |
| <i>Pantoea</i>           | 1 | 0 | 0 | 0 | 0 | 0 | 1  | 0 | 0  | 0  | 0  | 0 |
| <i>Paraburkholderia</i>  | 0 | 0 | 0 | 0 | 0 | 0 | 0  | 0 | 1  | 0  | 1  | 0 |
| <i>Patulibacter</i>      | 0 | 0 | 0 | 1 | 0 | 0 | 0  | 0 | 1  | 0  | 0  | 0 |
| <i>Pedobacter</i>        | 0 | 0 | 0 | 0 | 0 | 0 | 0  | 0 | 0  | 0  | 1  | 0 |
| <i>Phyllobacterium</i>   | 0 | 0 | 0 | 0 | 0 | 0 | 0  | 0 | 0  | 0  | 1  | 0 |
| <i>Promicromonospora</i> | 0 | 0 | 0 | 0 | 0 | 0 | 0  | 0 | 0  | 0  | 1  | 0 |
| <i>Pseudacidovorax</i>   | 0 | 0 | 0 | 0 | 0 | 0 | 1  | 0 | 0  | 0  | 0  | 0 |
| <i>Pseudomonas</i>       | 0 | 0 | 1 | 0 | 0 | 0 | 1  | 1 | 1  | 1  | 0  | 0 |
| <i>Rahnella</i>          | 0 | 0 | 1 | 0 | 0 | 0 | 0  | 0 | 1  | 0  | 0  | 0 |
| <i>Raoultella</i>        | 0 | 0 | 1 | 0 | 0 | 0 | 0  | 1 | 0  | 0  | 0  | 0 |
| <i>Rathayibacter</i>     | 0 | 0 | 0 | 0 | 0 | 0 | 0  | 0 | 0  | 0  | 1  | 0 |
| <i>Rhizobium</i>         | 1 | 0 | 0 | 0 | 0 | 0 | 0  | 0 | 0  | 0  | 0  | 0 |
| <i>Roseateles</i>        | 0 | 0 | 0 | 0 | 0 | 0 | 0  | 0 | 1  | 1  | 0  | 0 |
| <i>Rosenbergiella</i>    | 0 | 0 | 0 | 0 | 0 | 0 | 0  | 0 | 0  | 0  | 0  | 0 |
| <i>Sphingobacterium</i>  | 0 | 0 | 0 | 0 | 0 | 0 | 1  | 0 | 0  | 0  | 0  | 0 |
| <i>Sphingomonas</i>      | 0 | 0 | 0 | 0 | 0 | 0 | 1  | 0 | 0  | 0  | 0  | 0 |
| <i>Sphingopyxis</i>      | 0 | 0 | 0 | 0 | 0 | 0 | 0  | 0 | 0  | 0  | 1  | 0 |
| <i>Sporosarcina</i>      | 0 | 0 | 0 | 0 | 0 | 0 | 1  | 0 | 0  | 0  | 0  | 0 |
| <i>Staphylococcus</i>    | 0 | 1 | 0 | 0 | 0 | 0 | 0  | 0 | 1  | 0  | 1  | 0 |
| <i>Stenotrophomonas</i>  | 0 | 0 | 0 | 0 | 0 | 0 | 0  | 0 | 0  | 0  | 0  | 0 |
| <i>Streptomyces</i>      | 0 | 0 | 0 | 1 | 0 | 0 | 0  | 0 | 0  | 0  | 1  | 0 |
| <i>Variovorax</i>        | 0 | 0 | 0 | 0 | 0 | 0 | 0  | 0 | 1  | 1  | 0  | 0 |
| Total number of genera   | 7 | 3 | 7 | 6 | 1 | 1 | 12 | 6 | 21 | 14 | 24 |   |

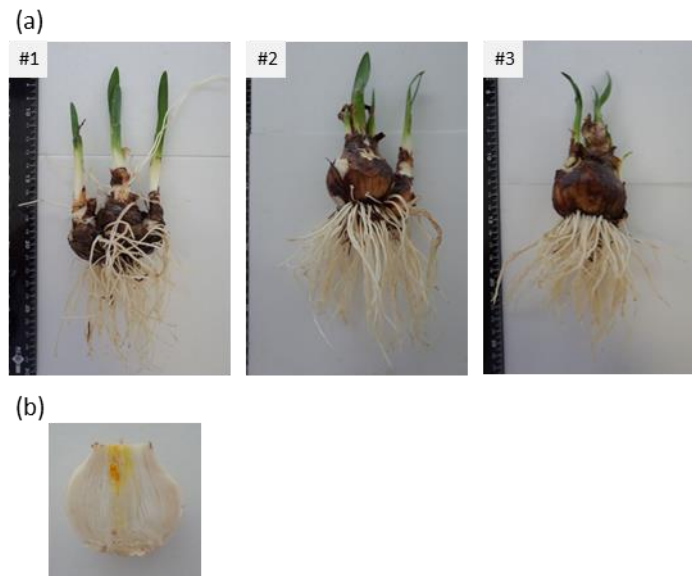

**Figure S1.** (a) Sampled plants after washing with running tap water; (b) A segment of the bulb of plant 2.

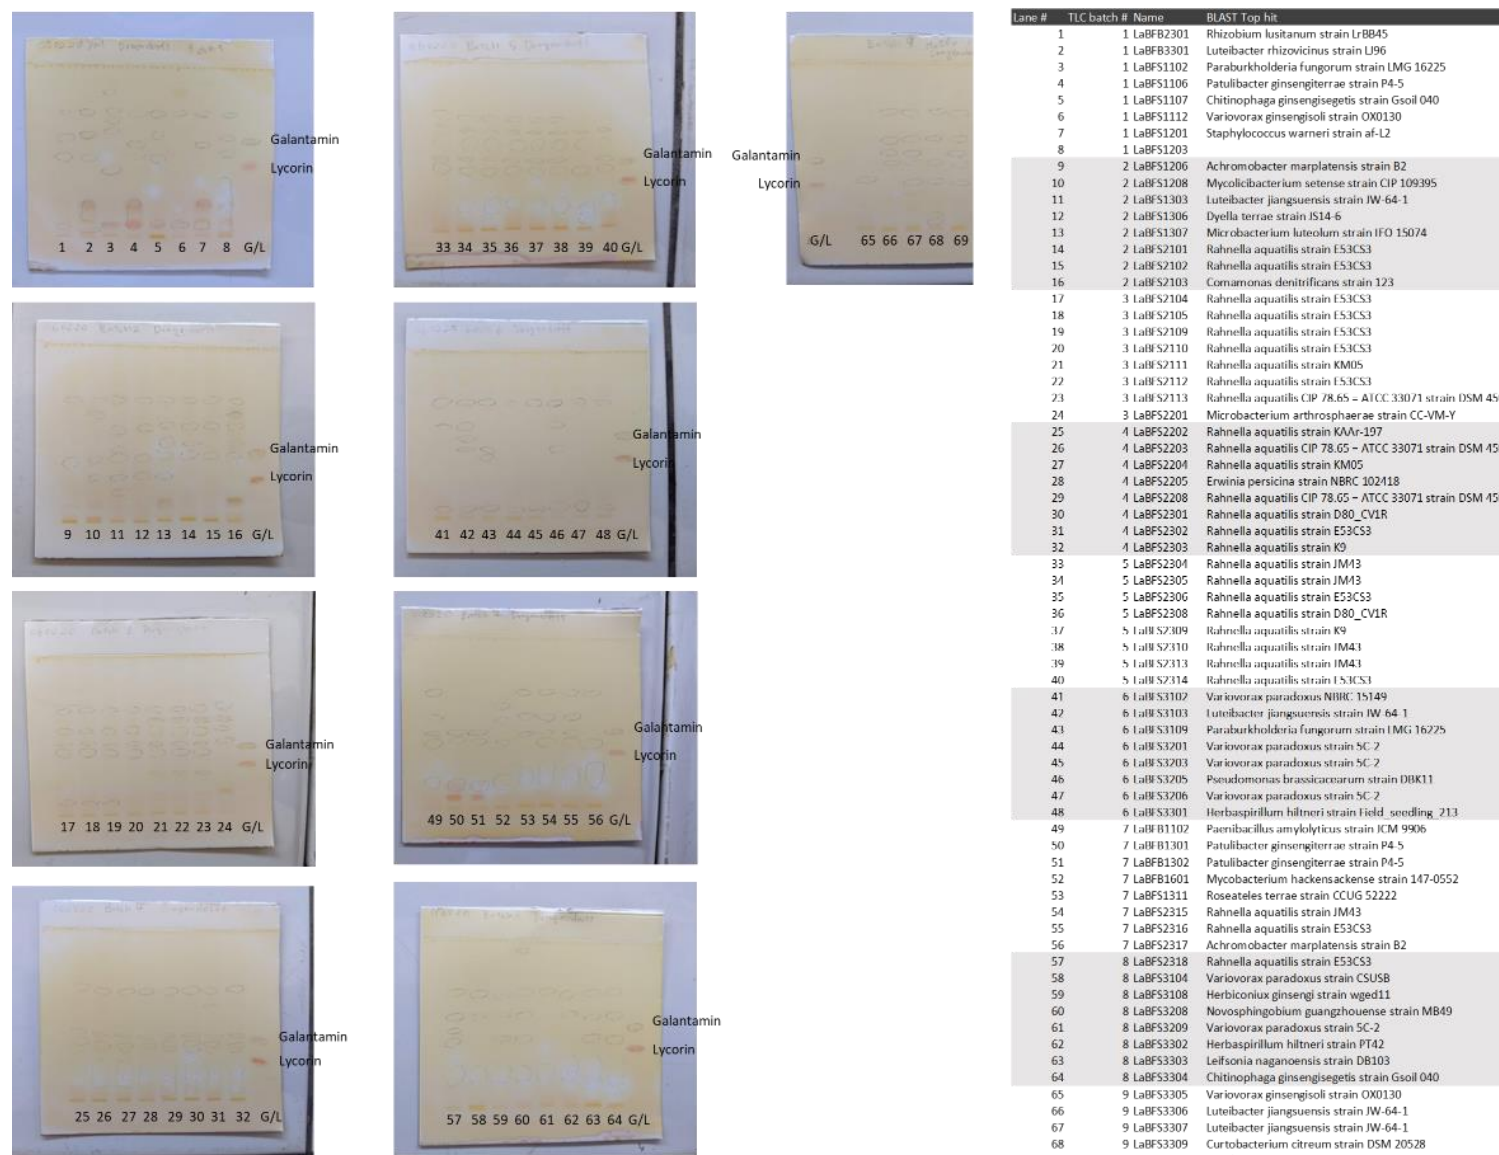

**Figure S2.** The plates of HPTLC of the 69 endophyte extracts after Dragendorff's reagent spraying.

The photos were observed after being dried over one night. The lane number in the plate photos corresponds to the first column of the left table. Lycorine and galantamine at 1 mg/mL were applied and developed together with the samples.





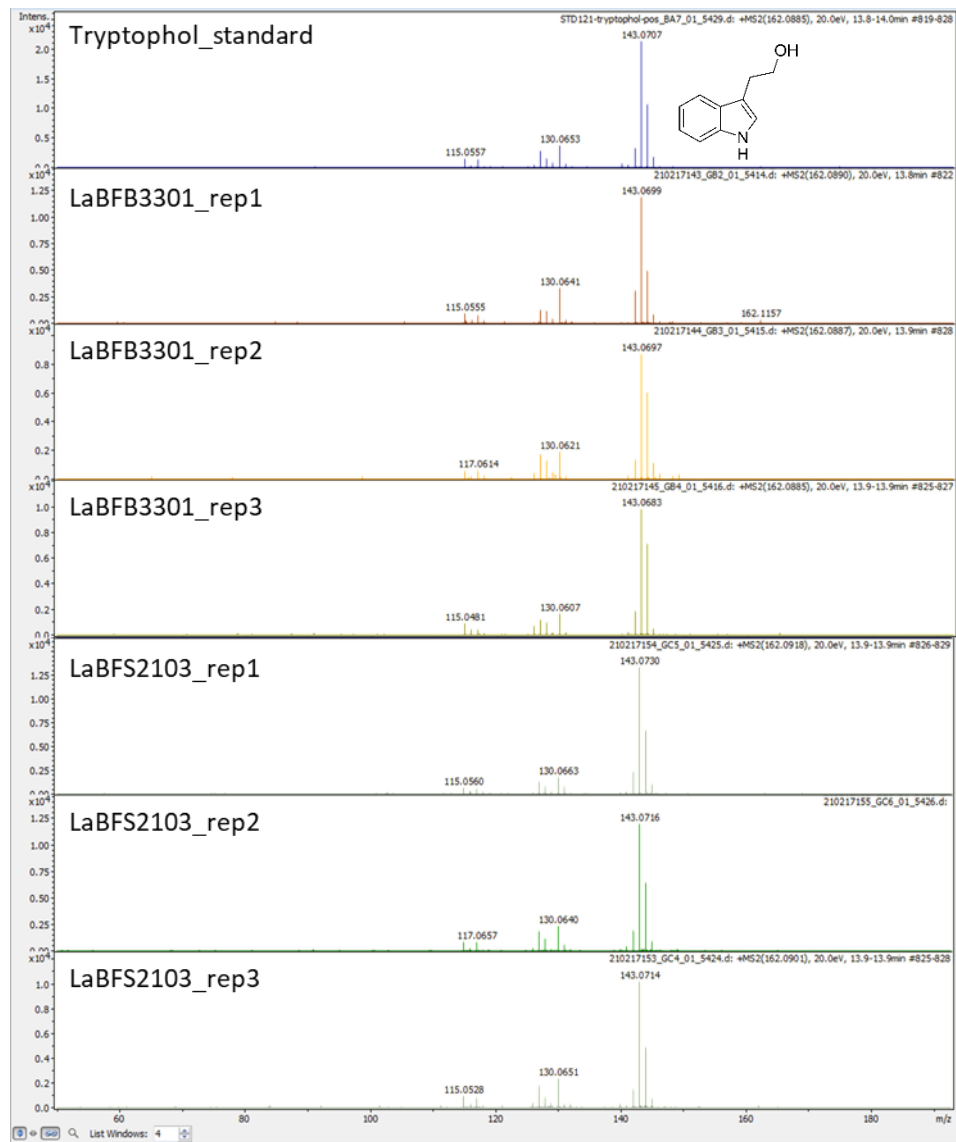

**Figure S4.** Identification of tryptophol in the extract of LaBFB3301 and LaBFS2103.
